# Supplementary material for: Detectability of seismic waves from the submarine landslide that caused the 1998 Papua New Guinea tsunami
Source: Copernicus journal article supplement (doi:10.5194/nhess-2018-317), 2018-11-14
Supplement: Supplementary file [file nhess-2018-317-SC3-supplement.pdf]

# Detectability of seismic waves from the submarine landslide that caused the 1998 Papua New Guinea tsunami

Akio Katsumata<sup>1</sup>, Yasuhiro Yoshida<sup>2</sup>, Kenji Nakata<sup>1</sup>, Kenichi Fujita<sup>1</sup>, Masayuki Tanaka<sup>1</sup>, Koji Tamaribuchi<sup>1</sup>, Takahito Nishimiya<sup>1</sup>, and Akio Kobayashi<sup>1</sup>

<sup>1</sup>Meteorological Research Institute, Japan Meteorological Agency, 1-1 Nagamine, Tsukuba, Ibaraki Prefecture, Japan

<sup>2</sup>Meteorological College, Japan Meteorological Agency, 7-4-81 Asahi-cho, Kashiwa, Chiba Prefecture, Japan

**Correspondence:** Akio Katsumata (akatsuma@mri-jma.go.jp)

**Abstract.** On 17 July 1998, a tsunami caused serious damage on the northern coast of Papua New Guinea about 20 min after the mainshock of an  $M_w$  7.0 earthquake. The tsunami has been attributed to a submarine landslide that occurred about 13 min after the mainshock because its arrival at the coast was too late and its height too great to be the direct result of the fault slip of the earthquake. Bathymetric data recorded after the tsunami revealed an amphitheater-like structure that was consistent with a recent submarine landslide. Most current tsunami warning systems are based on analysis of the early arrivals of seismic waves generated by an earthquake. In this study we investigated whether evidence of the landslide could be identified in the coda waves recorded after the mainshock. Based on previous studies of the tsunami source, we constructed synthetic seismograms to represent the submarine landslide and compared them to the observed coda waves of the preceding earthquake, with particular attention to the period around 13 min after the mainshock [in frequency ranges close to the landslide duration](#). We found phases possibly corresponding to the landslide event. However, they were easily covered with coda waves from the mainshock. We concluded that the 1998 landslide was too small to be evident in the coda waves following the magnitude 7 earthquake.

*Copyright statement.* TEXT

## 1 Introduction

A tsunami struck the north coast of Papua New Guinea (PNG) on 17 July 1998. The height of the tsunami was more than 10 m and its passage resulted in the deaths of more than two thousand people (e.g., Kawata et al. , 1999; Tappin et al. , 1999; Synolakis et al. , 2002). The tsunami struck the coast about 20 min after an earthquake (Kawata et al. , 1999) of  $M_w$  7.0 (GCMT, Dziewonski et al. , 1981; Ekström et al. , 2012). The arrival time of the tsunami was too late and its height too great for it to have been a direct result of the fault slip of the earthquake. Moreover, bathymetric data recorded after the earthquake revealed an amphitheater-like structure consistent with recent submarine slumping about 20 km off the coast (Tappin et al. , 1999). It was therefore presumed that the tsunami was caused by a submarine landslide (e.g., Tappin et al. , 1999; Heinrich et al. , 2000; Synolakis et al. , 2002). Numerical simulations of the landslide (e.g., Tappin et al. , 1999; Watts et al. ,

2003; Lynett et al. , 2003) provided landslide masses of  $6.4 \text{ km}^3$  ([Tappin et al., 1999](#)[Tappin et al. , 2008](#)),  $4 \text{ km}^3$  (Heinrich et al. , 2000), and  $9 \text{ km}^3$  (Watts et al. , 2003).

Various types of submarine mass failures have been recognized, and some mass flows traveled hundreds of kilometers (e.g., Schwab et al. , 1993). The mass motion distance of the 1998 PNG event was estimated at a relatively short one (e.g., 766 m by Watts et al. , 2005; 980 m by Tappin et al. , 2008), and was a slump type.

Early warnings of impending tsunamis are usually issued based on analyses of the early arrivals of seismic waves generated by earthquakes. If the submarine landslide after the 1998 PNG earthquake had been detected in the seismic data recorded immediately after the earthquake, it might have been possible to provide advanced warnings to PNG residents of the imminent tsunami. In this study, we investigated whether the seismic signature of the submarine landslide was present in the coda waves of the seismic data recorded after the mainshock of the 1998 earthquake. It is necessary to estimate size of a landslide as well as its source type for tsunami warning purpose. The 1998 PNG events was identified in a hydrophone record (Synolakis et al. , 2002; Okal , 2003). Caplan-Auerbach et al. (2001) reported hydrophone records from submarine landslides at Kilauea volcano. When source size is estimated from observed amplitudes, frequency range of records should cover the process duration for a proper estimation (e.g., Aki , 1967). The duration of the 1998 PNG landslide was estimated at several tens to 100 s (Watts et al. , 2003; Tappin et al. , 2008). The passband of the hydrophone arrays (e.g., 1–40 Hz of the PMEL hydrophone array, Caplan-Auerbach et al. , 2001; 1–30 Hz at Wake Island, Okal , 2003) seems to be insufficient to estimate the size of the landslide. Whereas the duration of the waves would have reflected the duration of landslide (Synolakis et al. , 2002; Okal , 2003), the mass size and the duration are not directly related to each other. We focus on seismic records of frequency ranges of 0.01–1 Hz.

## 20 **2 Observed seismic records**

The broadband seismic data recorded during the  $M_w$  7.0 earthquake that preceded the 1998 tsunami has been archived at both the Earthquake Research Institute (ERI; The University of Tokyo) and the Incorporated Research Institutions for Seismology (IRIS; headquarters in Washington DC). The two seismic stations from which data were mainly used in this study were 146 km (Jayapura station, JAY) and 918 km (Port Moresby station, PMG) from the epicenter (Fig. 1).

Synolakis et al. (2002) calculated that the submarine landslide occurred 13 min after the mainshock on the basis of hydrophone data recorded at Wake Island. Heidarzadeh and Stake (2015) used tide gauge data to estimate that the landslide occurred 12–17 min after the mainshock. Synolakis et al. (2002) pointed out that seismic signal corresponding to the landslide could not be recognized at PMG. Okal (2003) showed a highpass-filtered seismic record ( $> 1 \text{ Hz}$ ) obtained at JAY station, and attributed an event at 09:02 to the landslide. Records at JAY show no significant events at around 13 min after the mainshock in the four frequency bands considered and spectrographs of 0.01-1 Hz (Fig. 2) . Aftershocks occurred at 09:02:06 ( $m_b$ , 4.4) and 09:06:03 (no magnitude reported). The event at 09:02:06 was considered to be directly related to the submarine landslide (Synolakis et al. , 2002; Okal , 2003). Those earthquakes are not evident in this frequency and amplitude range. Whereas any significant events are not seen in the records at six stations around source area (Fig. 3), small phases are recognized about 13

min after the S-arrival in the 50–100 s band of horizontal components at JAY and PMG (bold parts of seismic waves in Fig. 3). The particle motions of the bold parts were oriented to north-south at JAY and northeast-southwest at PMG, which were roughly consistent with those of the Love waves from the source area. However, there were not such events in the records at the other stations (Fig. 3).

### 5 3 Comparison of synthetic seismograms representing the 1998 submarine landslide with coda waves from the 1998 earthquake

We estimated the amplitudes of the seismic waves generated by the 1998 landslide on the basis of the work of Watts et al. (2003), as described below. Relatively large amplitudes were expected based on the model by Watts et al. (2003) because of its relatively large assumed mass.

10 When a landslide starts, the change in the force that has supported the landslide mass generates seismic waves. The force ( $F$ ) generated by a landslide is defined by  $F = ma$ , where  $m$  is the mass of the landslide and  $a$  is its acceleration. Watts et al. (2003) assumed the landslide mass to be a half ellipsoid and, on the basis of the parameters given in Table 1, estimated its volume to be  $9 \text{ km}^3$  ( $\frac{\pi w b T}{6}$ ) and its mass to be  $19 \times 10^{12} \text{ kg}$ . Using this mass and the initial acceleration  $a_0$  ( $0.36 \text{ m s}^{-2}$ ; Table 1) of Watts et al. (2003) gives an estimated force of  $7 \times 10^{12} \text{ N}$ . The volume determined by Watts et al. (2003) ( $9 \text{ km}^3$ ) is  
15 larger than those of Heinrich et al. (2000) ( $4 \text{ km}^3$ ), Synolakis et al. (2002) ( $4 \text{ km}^3$ ), and Tappin et al. (2008) ( $6.4 \text{ km}^3$ ), and the acceleration of  $0.36 \text{ m s}^{-2}$  is smaller than that used by Tappin et al. (2008) ( $0.47 \text{ m s}^{-2}$ ). The force and volume estimated here for the 1998 PNG landslide are comparable to those estimated by Kanamori and Given (1982) for the landslide associated with the 1980 Mount St. Helens eruption ( $10^{13} \text{ N}$  and  $2.5 \text{ km}^3$ , respectively).

Amplitudes of far-field seismic waves are theoretically proportional to the amplitude of the acting force (e.g., Aki and Richards, 2002). For a case of a longer-duration mass failure, the total energy would become greater. Even for such a case, the amplitudes of seismic waves should be constrained by the peak of the force.

The time history of a landslide must be assumed in order to estimate the amplitude of the resultant seismic wave. Watts et al. (2003) assumed a characteristic time of 32 s. Tappin et al. (2008) estimated that the sliding process lasted about 100 s. We assumed that the sliding process was completed within several tens of seconds with an initial acceleration stage followed by a  
25 deceleration stage (Ekström et al., 2012 as shown in Fig. 4), and that the total impulse would not have been balanced because part of the deceleration stage would be affected by interaction of the sliding mass with sea water. Here we assume the same peak values of acceleration for starting and stopping. Since it was estimated that the landslide occurred inside the existing amphitheatre (Synolakis et al., 2002; Okal, 2003; Sweet and Silver, 2003), it may have stopped with a large acceleration.  
The curves for each of the four intervals defined on Fig. 4 were expressed as trigonometric functions (Table 2). Five different  
30 time histories were considered (Table 3). The peaks of  $\int F dt/m$  range from 3 to  $11 \text{ m s}^{-1}$ . The value  $11 \text{ m s}^{-1}$  of case (c) (Table 3) is close to  $u_{max}$  of Table 1. We constructed synthetic seismic records (Figs. 5 and 6) by applying the method of Takeo (1985) and using the seismic velocity model given in Table 4.

The amplitudes of our synthetic records are comparable to or larger than those of the seismic waves recorded after the mainshock of the  $M_w$  7.0 earthquake in the 50–100 s passband (Figs. 5 and 6). The phases indicated with bold lines could be the seismic waves from the landslide which caused the disastrous tsunamis. Whereas the ratios of the observed amplitudes to the synthetics at JAY were generally small, those at PMG were not so small. It is difficult to retrieve a consistent result about the source parameters from this comparison. The amplitudes of the phase was smaller than the successive seismic wave at JAY.

[Ekström et al. \(2012\) presented scaling relationship of landslides. The force of  \$7 \times 10^{12}\$  N corresponds to 5.8 of surface wave magnitude according to the scaling relation. A vertical displacement of 0.05 mm is expected at a epicentral distance of 2000 km and at a period of 20 s for this surface wave magnitude \( Vaněk et al. , 1962\). The amplitude of 0.05 mm is comparable to the observed amplitudes of coda waves at stations of epicentral distance around 2000km for a passband around 20 s \(7\).](#) It is unlikely to recognize the occurrence of the landslide based on the seismic records after the large earthquake.

#### 4 Discussion

Several studies have shown that seismic waves generated by landslides can be detected. The landslide associated with the 1980 eruption of Mount St. Helens (Kanamori and Given , 1982; vol.  $2.5 \text{ km}^3$ ) is the largest of these. Yamada et al. (2012) analyzed seismic waves generated by landslides (vols. of up to  $13.6 \times 10^6 \text{ m}^3$ ) caused by heavy rain in Japan. Li et al. (2017) used seismic data to analyze the dynamic process of a landslide (vol.  $5 \times 10^6 \text{ m}^3$ ) in southwest China. Landslides in Greenland that caused tsunamis in 2000 (Dahl-Jensen et al. , 2004; underwater vol.  $30 \times 10^6 \text{ m}^3$ ) and 2017 (Chao et al. , 2018; vol.  $35\text{--}51 \times 10^6 \text{ m}^3$ ) were recorded by seismometers. For the 2000 Greenland event, Dahl-Jensen et al. (2004) estimated the surface-wave magnitude of the event to be 2.3. [Ekström and Stark \(2013\) showed scaling relationship of large landslides.](#)

In cases such as the 1998 PNG tsunami, where the submarine landslide that caused it occurred some minutes after an earthquake, the seismic signature of the landslide can be masked by the seismic waves generated by the earthquake. In 1908, after a magnitude 7.1 earthquake, the southern Italian coast was struck by a 5–10 m tsunami ([?; ?Salamon et al. , 2007](#)) that Billi et al. (2008) attributed to a submarine landslide. The event in Italy in 1908 appears to be similar to the 1998 PNG earthquake and tsunami.

Because some onshore earthquakes of magnitude about 7 or greater are known to have caused landslides, it is likely that offshore earthquakes of similar magnitude cause submarine landslides. Kodaira et al. (2012) suggested that a submarine landslide might have been caused by the 2011 Tohoku-oki earthquake ( $M_w$  9.0). [Tappin et al. \(2014\) model a tsunami source with a landslide to explain tsunami heights along the coast of Sanriku district of the 2011 Tohoku-oki earthquake.](#) However, the seismic and tsunami signatures of ~~such~~ landslides are likely masked by the responses to the fault motions of the earthquakes. An extraordinarily large landslide mass would be required to prevent its signatures from being overwhelmed by the responses of the fault motion of a magnitude 7 or greater earthquake.

It is considered that long periods of seismic inactivity or quick sedimentation (Sawyer et al. , 2017) is required for the accumulation on submarine slopes of sufficient sediment to generate a landslide large enough to cause a tsunami of comparable size to the 1998 PNG tsunami. The Mediterranean is ~~a seismically inactive region where , according to ? , most a region where~~

~~seismic activity is low enough that many~~ of the known tsunamis ~~may~~ have been caused by ~~submarine landslides~~. ~~Because southeast Asia is a seismically active area, such an inactive condition unlikely realizes~~ ~~landslides~~ (Salamon et al. , 2007; Papadopoulos et al. , 2014). ~~Because of the greater seismicity, such conditions do not exist in southeast Asia~~. It is plausible ~~that the heavy rainfall characteristic of the equatorial belt promotes rapid accumulation of large volumes of marine sediment that~~

5 ~~there that heavy rainfall and rapid deposition of terrigenous sediment offshore~~ might contribute to the occurrence of submarine landslides, including the 1998 PNG landslide, despite their location in a seismically active region. A few tsunamis in Japan, where tectonic activity is very high, have also been attributed to submarine landslides (e.g., Baba et al. , 2012; Baba et al. , 2017).

Chao et al. (2018) considered the use of seismic records to detect landslides in order to provide early warnings of impending  
10 tsunamis. However, as we have demonstrated here, the seismic signature of large submarine landslides can be overwhelmed by the seismic coda waves generated by earthquakes, so it can be difficult to detect submarine landslides soon after large earthquakes by this method. An alternative method of providing early warnings for tsunamis generated by submarine landslides is needed. Monitoring by networks of ocean-bottom tsunami gauges such as those of DONET (Kawaguchi et al. , 2015) or S-net (Uehira et al. , 2016) might be a useful approach. For the 1998 PNG event, the tsunami source was about 20 km from the  
15 shoreline. This distance is shorter than the 30 km spacing between S-net sensors, so an array of similar dimensions to the S-net system would be too sparse for direct detection of tsunami waves such as those of the 1998 PNG tsunami with plural sensors. Other technologies with potential for direct detection of tsunami waves are tsunami radar (Barrick , 1979) and a fine barometer (Arai et al. , 2011), with which a tsunami is detected by reflection of electromagnetic waves or atmospheric pressure changes.

## 5 Conclusions

20 We investigated whether the tsunami-generating submarine landslide that occurred about 13 min after the 1998 PNG earthquake could be identified in the coda waves of the seismic data ~~for the periods close to the landslide duration~~. We constructed synthetic seismograms to represent the seismic signature of the landslide and compared them to the seismic data recorded after the earthquake, with particular attention to the period around 13 min after the earthquake. We found small seismic phases possibly from the landslide. However, those phases were difficult to be recognized as an indication of a disastrous tsunami.  
25 Other methods are needed to provide data for early warnings of tsunamis generated by submarine landslides of similar size (or smaller) to the one that generated the 1998 PNG tsunami. Networks of ocean-bottom tsunami gauges, similar to those provided by the DONET and S-net arrays in Japan, are among the likely candidates for this approach.

*Data availability.* Seismic data from the Jayapura seismic station are available at <http://ohpdmc.eri.u-tokyo.ac.jp/>. Seismic data from other seismic stations shown in this study are available at <https://www.iris.edu/hq/>.

*Author contributions.* AKA analyzed the observed and synthetic seismic records and compiled most of the paper. YY suggested input to the methodology for construction of the synthetic records used in this study. KN researched previous studies of the 1998 PNG earthquake and tsunami. KF undertook preliminary research on the observed seismic records. MT, KT, TN, and AKo contributed to the research into previous studies of tsunamis caused by landslides and participated in related discussions.

5 *Competing interests.* The authors declare that they have no conflicts of interest directly relevant to the content of this article.

*Acknowledgements.* We used seismic data archived at the Earthquake Research Institute (The University of Tokyo) and at the Incorporated Research Institutions for Seismology. We used a computer program developed by Prof. Minoru Takeo to calculate synthetic records. [We are grateful to Prof. Fryer, an anonymous reviewer, Prof. Tappin, and Prof. Okal for their thoughtful comments.](#)

## References

- [Aki, K.: Scaling law of seismic spectrum, \*J. Geophys. Res.\*, 72, 1217–1231, doi:10.1029/JZ072i004p01217, 1967.](#)
- [Aki, K. and Richards, P. G.: \*Quantitative Seismology, 2nd Ed., University Science Books, California, USA, 700pp, 2002.\*](#)
- Arai, N., Iwakuni, M., Watada, S., Imanishi, Y., Murayama, T., and Nogami, M.: Atmospheric boundary waves excited by the tsunami generation related to the 2011 great Tohoku–Oki earthquake, *Geophys. Res. Lett.*, 38, L00G18, doi:10.1029/2011GL049146, 2011.
- Baba, T., Matsumoto, H., Kashiwase, K., Hyakudome, T., Kaneda, Y., and Sano, M.: Micro-bathymetric evidence for the effect of submarine mass movement on tsunami generation during the 2009 Suruga Bay earthquake, Japan, in: *Submarine mass movements and their consequences, Advances in Natural and Technological Hazards Research 31*, edited by Yamada, Y., Kawamura, K., Ikehara, K., Ogawa, Y., Urgeles, R., Mosher, D., Chaytor, J., and Strasser, M., Springer, Germany, 485–495, 2012.
- Baba, T., Okada, T., Ashi, J., and Kanamatsu, T.: A possible source model of the 1512 Eisho tsunami described in an ancient document, JpGU-AGU Joint Meeting, Chiba, Japan, 20–25 May 2017, HDS12-10, 2017.
- Barrick, D. E.: A coastal radar system for tsunami warning, *Remote Sens. Environ.*, 8, 353–358, 1979.
- Billi, A., Funicello, R., Minelli, L., Faccenna, C., Neri, G., Orecchio, B., and Presti, D.: On the cause of the 1908 Messina tsunami, southern Italy, *Geophys. Res. Lett.*, 35, L06301, doi:10.1029/2008GL033251, 2008.
- [Caplan-Auerbach, J., Fox, C. G., and Duennebie, F. K.: Hydroacoustic detection of submarine landslides on Kilauea Volcano, \*Geophys. Res. Lett.\*, 28, 1811–1813, doi:10.1029/2000GL012545, 2001.](#)
- Chao, W.-A., Wu, T.-R., Ma, K.-F., Kuo, Y.-T., Wu, Y.-M., Zhao, L., Chung, M.-J., Wu, H., and Tsai, Y.-L.: The large Greenland landslide of 2017: Was a tsunami warning possible?, *Seismol. Res. Lett.*, 89, 1335–1344, doi:10.1785/0220170160, 2018.
- Dahl-Jensen, T., Larsen, L. M., Pedersen, S. A. S., Pedersen, J., Jepsen, H. F., Pedersen, G., Nielsen, T., Pedersen, A. K., Platen-Hallermund, F. V., and Weng, W.: Landslide and tsunami 21 November 2000 in Paatuut, west Greenland, *Nat. Hazards*, 31, 277–287, 2004.
- Dziewonski, A. M., Chou T.-A., and Woodhouse, J. H.: Determination of earthquake source parameters from waveform data for studies of global and regional seismicity, *J. Geophys. Res.*, 86, 2825–2852, doi:10.1029/JB086iB04p02825, 1981.
- Ekström, G., Nettles, M., and Dziewonski, A. M.: The global CMT project 2004–2010: Centroid-moment tensors for 13,017 earthquakes, *Phys. Earth Planet. In.*, 200–201, 1–9, doi:10.1016/j.pepi.2012.04.002, 2012.
- [Ekström, G. and Stark, C. P.: Simple scaling of catastrophic landslide dynamics, \*Science\*, 339, 1416–1419, doi:10.1126/science.1232887, 2013.](#)
- Heidarzadeh, M. and Satake, K.: Source properties of the 1998 July 17 Papua New Guinea tsunami based on tide gauge records, *Geophys. J. Int.*, 202, 361–369. doi:10.1093/gji/ggv145, 2015.
- Heinrich, P., Piatanesi, A., Okal, E. and Hébert, H.: Near-field modeling of the July 17, 1998 tsunami in Papua New Guinea, *Geophys. Res. Lett.*, 27, 3037–3040, doi:10.1029/2000GL011497, 2000.
- Kanamori, H., and Given, J. W.: Analysis of long-period seismic waves excited by the May 18, 1980, eruption of Mount St. Helens - A terrestrial monopole?, *J. Geophys. Res.*, 87, 5422–5432, doi:10.1029/JB087iB07p05422, 1982.
- Kawaguchi, K., Kaneko, S., Nishida T., and Komine, T.: Construction of the DONET real-time seafloor observatory for earthquakes and tsunami monitoring, in: *Seafloor Observatories*, edited by Favali, P., Beranzoli, L., and Santis A. D., Springer, Germany, 211–228, doi:10.1007/978-3-642-11374-1\_1, 2015,
- Kawata, Y., Benson, B. C., Borrero, J. C., Borrero, J. L., Davies, H. L., de Lange, W. P., Imamura, F., Letz, H., Nott, J., and Synolakis, C. E.: Tsunami in Papua New Guinea was as intense as first thought, *Eos, Trans. Am. Geophys. Union*, 80(9), 101–105, 1999.

- Kodaira, S., Fujiwara, T., and Nakamura, T.: Co-seismic displacement of the 2011 Tohoku-oki Earthquake reaching to the trench axis detected by differential bathymetry survey, *J. Geol. Soc. Japan*, 118, 530–534, doi:10.5575/geosoc.2012.0052, 2012. (in Japanese with English abstract)
- Li, Z., Huang, X., Xu, Q., Yu, D., Fan, J., and Qiao, X., Dynamics of the Wulong landslide revealed by broadband seismic records, *Earth Planets Space*, 69, 27, doi:10.1186/s40623-017-0610-x, 2017.
- Lynett, P. J., Borrero, J. C., Liu, P. L.-F., and Synolakis, C. E.: Field survey and numerical simulations: A review of the 1998 Papua New Guinea Tsunami, *Pure. Appl. Geophys.*, 160, 2119–2146, doi:10.1007/s00024-003-2422-0, 2003.
- [Okal, E. A.: Waves from the 1998 Papua New Guinea earthquake and its aftershocks: timing the tsunamigenic slump, \*Pure appl. geophys.\*, 160, 1843–1863, doi:10.1007/s00024-003-2409-x, 2003.](#)
- 10 [Papadopoulos, G. A., Grácia, E., Urgeles, R., Sallares, V., De Martini, P. M., Pantosti, D., González, M., Yalciner, A. C., Mascle, J., Sakellariou, D., Salamon, A., Tinti, S., Karastathis, V., Fokaefs, A., Camerlenghi, A., Novikova, T., and Papageorgiou, A.: Historical and pre-historical tsunamis in the Mediterranean and its connected seas: Geological signatures, generation mechanisms and coastal impacts. \*Mar. Geol.\* 354, 81–109, doi:10.1016/j.margeo.2014.04.014, 2014.](#)
- Sawyer, D. E., Reece, R. S., Gulick, S. P. S., and Lenz, B. L.: Submarine landslide and tsunami hazards offshore southern Alaska: Seismic strengthening versus rapid sedimentation, *Geophys. Res. Lett.*, 44, 8435–8442, doi:10.1002/2017GL074537, 2017.
- Synolakis, C. E., Bardet, J.-P., Borrero, J. C., Davies, H. L., Okal, E. A., Silver, E. A., Sweet, S., and Tappin, D. R.: The slump origin of the 1998 Papua New Guinea tsunami, *P. Roy. Soc. A-Math. Phy.*, 458, 763–789, doi:10.1098/rspa.2001.0915, 2002.
- Salamon, A., Rockwell, T., [Ward, S. N.](#), Guidoboni, E., and Comastri, A.: [A critical evaluation of tsunami records reported for the Levant Coast from the second millennium BCE to the present, \*Israel. J. Earth Sci.\*, 58, 327–354](#) [Tsunami hazard evaluation of the eastern Mediterranean: historical analysis and selected modeling, \*B. Seismol. Soc. Am.\*, 97, 705–724, doi:10.1560/10.1785/JES-58.2-3.327, 2011-0120060147, 2007.](#)
- 20 [Schwab, W. C., Lee, H.J. and Twichell, D. C. \(eds\): \*Submarine landslides: selected studies in the US exclusive economic zone\*, US Geol. Surv. Bull. B-2002. Washington, DC: US Geological Survey, 1993.](#)
- [Sweet, S., and Silver, E. A. :Tectonics and slumping in the source region of the 1998 Papua New Guinea tsunami from seismic reflection images. \*Pure Appl. Geophys.\*, 160, 1945–1968, 2003.](#)
- 25 Takeo, M.: Near-field synthetic seismograms taking into account the effects of anelasticity -The effects of anelastic attenuation on seismograms caused by a sedimentary layer-, *Pap. Meteorol. Geophys.*, 36, 245–257, 1985, doi:10.2467/mripapers.36.245. (In Japanese with English abstract)
- Tappin, D. R., Matsumoto, T., Watts, P., Satake, K., McMurtry, G. M., Matsuyama, M., Lafoy, Y., Tsuji, Y., Kanamatsu, T., Lus, W., Iwabuchi, Y., Yeh, H., Matsumoto, Y., Nakamura, M., Mahoi, M., Hill, P., Crook, K., Anton, L., and Walsh, J. P.: Sediment slump likely caused 1998 Papua New Guinea tsunami, *Eos, Trans. Am. Geophys. Union*, 80(30), 329–344, 1999.
- 30 Tappin, D. R. , Watts, P., Grilli, S. T.: The Papua New Guinea tsunami of 17 July 1998: anatomy of a catastrophic event, *Nat. Hazard Earth Sys.*, 8, 243–266, doi:10.5194/nhess-8-243-2008, 2008
- [Tappin, D. R., Grilli, S. T., Harris, J. C., Geller, R. J., Masterlark, T., Kirby, J. T., Shi, F., Ma, G., Thingbaijam, , K.K.S., and Mai, P. M.: Did a submarine landslide contribute to the 2011 Tohoku tsunami?, \*MAR. GEOL.\*, 357, 344–361, doi:10.1016/j.margeo.2014.09.043, 2014.](#)
- 35 Uehira, K., Kanazawa, T., Mochizuki, M., Fujimoto, H., Noguchi, S., Shinbo, T. Shiomi, K., Kunugi, T., Aoi, S., Matsumoto, T., Sekiguchi, S., Okada, Y., Shinohara, M., and Yamada, T.: Outline of Seafloor Observation Network for Earthquakes and Tsunamis along the Japan Trench (S-net), EGU General Assembly, Vienna, Austria, 17–22 April 2016, EPSC2016-13832, 2016.



[Vaněk, J., Zatopek, A., Karnik, V., Kondroskaya, N. V., Riznichenko, Y. V., Savarensky, E. F., Solov'ev, S. L., and Shebalin, N.V.: Standardization of magnitude scales, \*Izu. Acak. Nauk. SSSR, Ser. Geofiz.\*, 2, 108-111, 1962.](#)

Watts, P., Grilli, S. T., Kirby, J. T., Fryer, G. J., and Tappin, D. R.: Landslide tsunami case studies using a Boussinesq model and a fully nonlinear tsunami generation model, *Nat. Hazard Earth Sys.*, 3, 391–402, doi:10.5194/nhess-3-391-2003, 2003.

- 5 [Watts, P., Grill, S. T., M.ASCE, Tappin, D. R., and Fryer, G. J.: Tsunami generation by submarine mass failure II: Predictive equations and case studies, \*J. Waterw. Port C-ASCE\*, 131, 298–310, doi:10.1061/\(ASCE\)0733-950X\(2005\)131:6\(298\), 2005.](#)

Yamada, M., Matsushi, Y., Chigira, M., and Mori, J.: Seismic recordings of landslides caused by Typhoon Talas (2011), Japan, *Geophy. Res. Lett.* 39, L13301, doi:10.1029/2012GL052174, 2012

**Table 1.** Parameters used by Watts et al. (2003) to simulate the 1998 PNG tsunami.

| Quantities                     | Values |
|--------------------------------|--------|
| $\gamma$                       | 2.15   |
| $b$ (km)                       | 4.5    |
| $T$ (m)                        | 760    |
| $w$ (km)                       | 5      |
| $d$ (m)                        | 1500   |
| $\theta$ (degrees)             | 12     |
| $a_o$ (m s <sup>-2</sup> )     | 0.36   |
| $u_{max}$ (m s <sup>-1</sup> ) | 11.6   |
| $s_o$ ( <del>km</del> )        | 375    |
| $t_o$ (s)                      | 32     |
| $\lambda_o$ (km)               | 7.8    |
| $\eta_o$ (m)                   | -25    |

$\gamma$ , the specific density;  $b$ , the initial landslide length;  $T$ , the maximum initial landslide thickness;  $w$ , the maximum landslide width;  $d$ , the mean initial landslide depth;  $\theta$ , the mean initial incline angle;  $a_o$ , the slump initial acceleration;  $u_{max}$ , the maximum slump velocity;  $s_o$ , the characteristic distance of slump motion;  $t_o$ , the characteristic time of slump motion;  $\lambda_o$ , the characteristic wavelength;  $\eta_o$ , the characteristic tsunami amplitude.

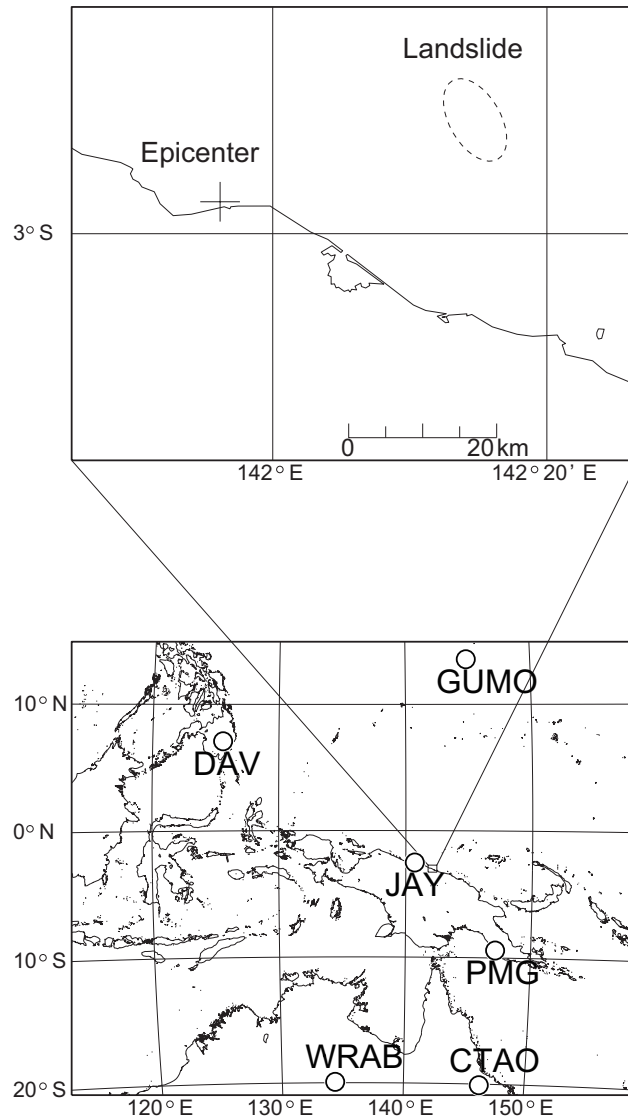

**Figure 1.** Maps of Papua New Guinea showing the location of the source area of the 1998 tsunami. The cross in the upper map indicates the epicenter of the  $M_w$  7.0 earthquake that occurred at 8:49 on 17 July 1998 (UTC) and the ellipse (broken line) marks the source location of the tsunami (as estimated by Tappin et al. , 1999) that struck the coast about 20 min after the mainshock. Circles on the lower map indicate the locations of seismic stations at Guam (GUMO), Davao (DAV), Jayapura (JAY), Port Moresby (PMG), Tennant Creek (WRAB), and Charters Towers (CTAO).

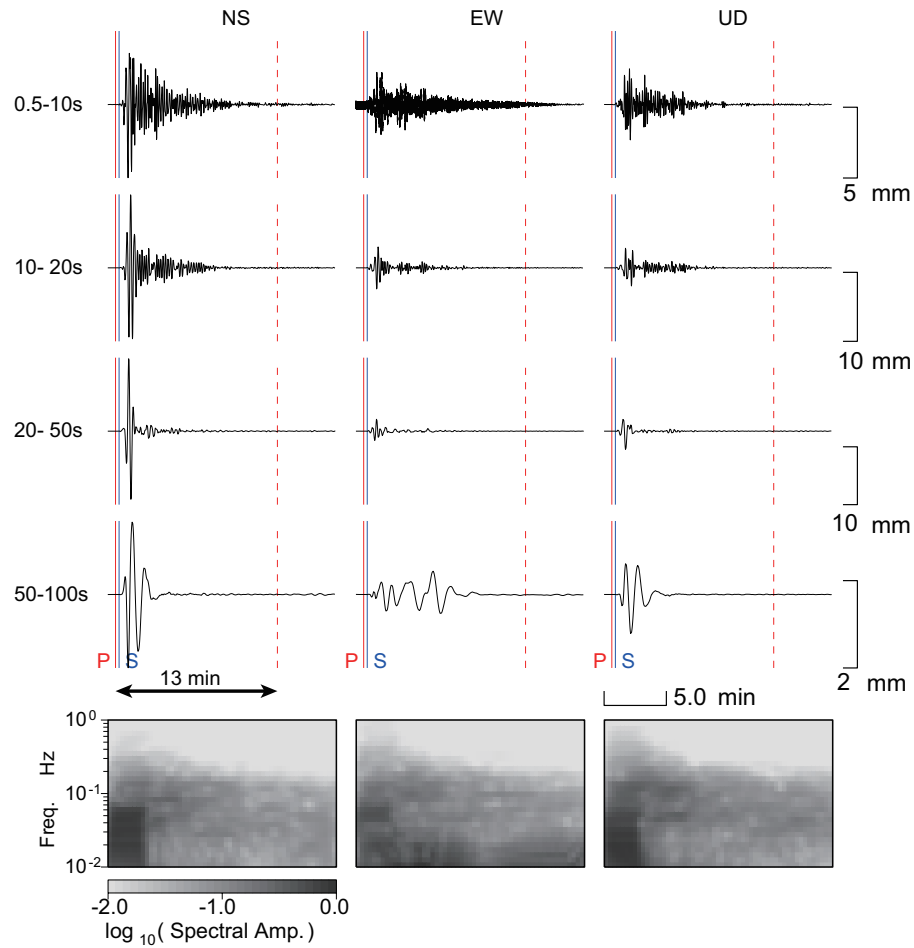

**Figure 2.** Seismic records obtained at station JAY (epicentral distance 146 km; location shown in Fig. 1) with four different passband filters applied after instrument response correction. Calculated P-wave (red lines) and S-wave (blue lines) arrivals for the 1998 earthquake are shown. The red broken line marks 13 min after the P-wave arrival. [Spectrograph is shown at the bottom. A time windows of 200 s is used to calculate the spectrum.](#)

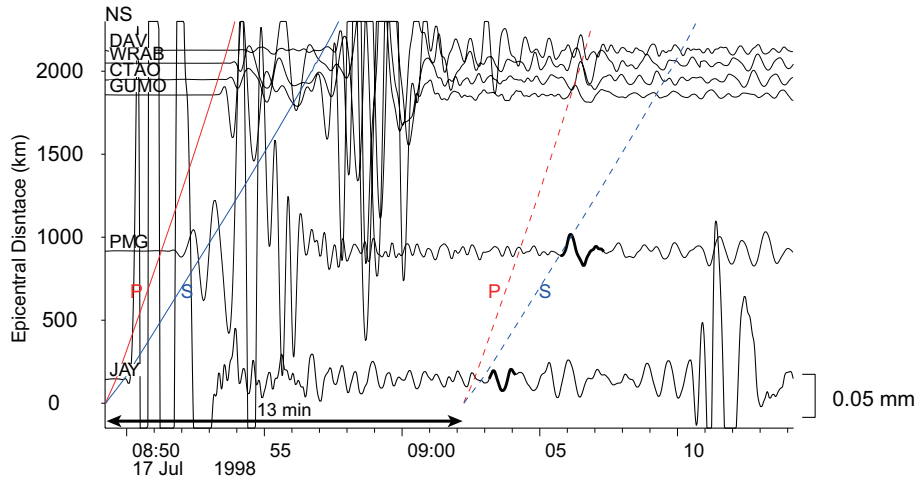

**Figure 3.** Seismic records of NS-component at six stations (Fig. 1) aligned according to the epicentral distance. A 50–100 s bandpass filter was applied to all records shown. Calculated P-wave (red line) and S-wave (blue line) arrivals for the mainshock are shown. The red and blue broken lines denote 13 min after the calculated arrivals which should indicate arrivals of seismic waves from the submarine landslide. The bold parts of seismic waves at JAY and PMG correspond to those in Figs. 5 and 6 and ~.

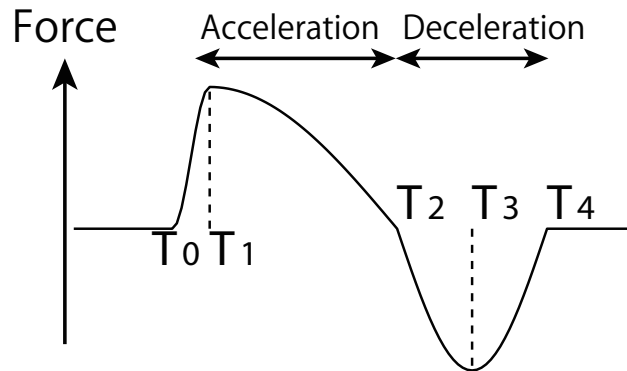

**Figure 4.** Schematic diagram showing the assumed source-time function for the force of the submarine landslide. Five different sets of intervals  $T_1 - T_0$ ,  $T_2 - T_1$ ,  $T_3 - T_2$ , and  $T_4 - T_3$  were considered (Table 3).

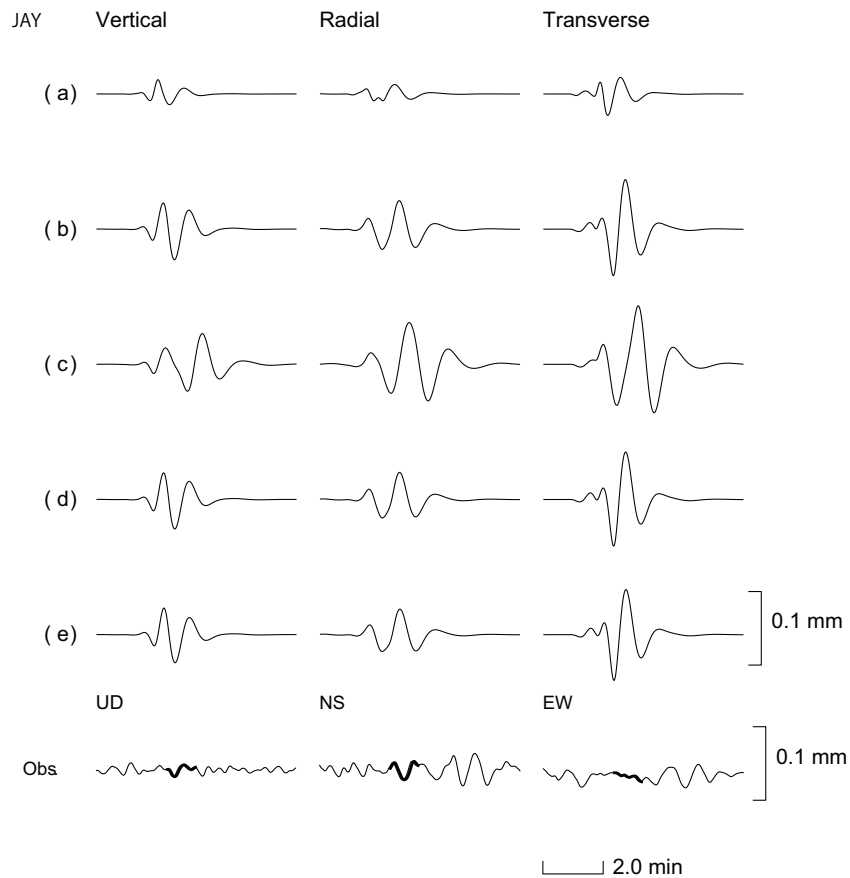

**Figure 5.** Synthetic seismic records constructed to represent the signature of the submarine landslide as it would have been recorded at station JAY, 176 km from the landslide source area (Fig. 1). The vertical and radial components are as viewed at an observation point along the assumed force direction. The transverse component is as viewed at an observation point on a line perpendicular to the direction of the source force. Different source-time functions were assumed for (a) to (e), as shown in Table 3. The seismic data recorded at station JAY 12.5 min after the mainshock are also shown (bottom panel). The bold parts of the observed records correspond to those in Figs. 3. A 50–100 s bandpass filter was applied to all records shown.

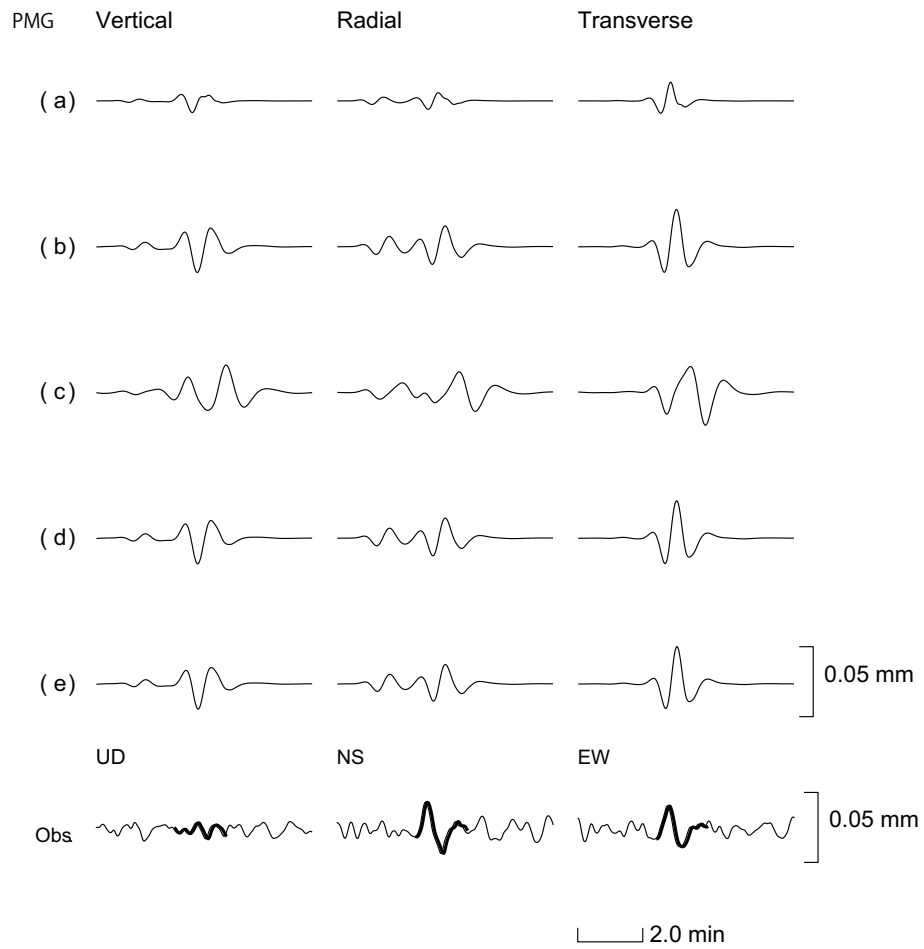

**Figure 6.** Synthetic seismic records as in Fig. 5, but for station PMG, 905 km from the landslide source area (Fig. 1).

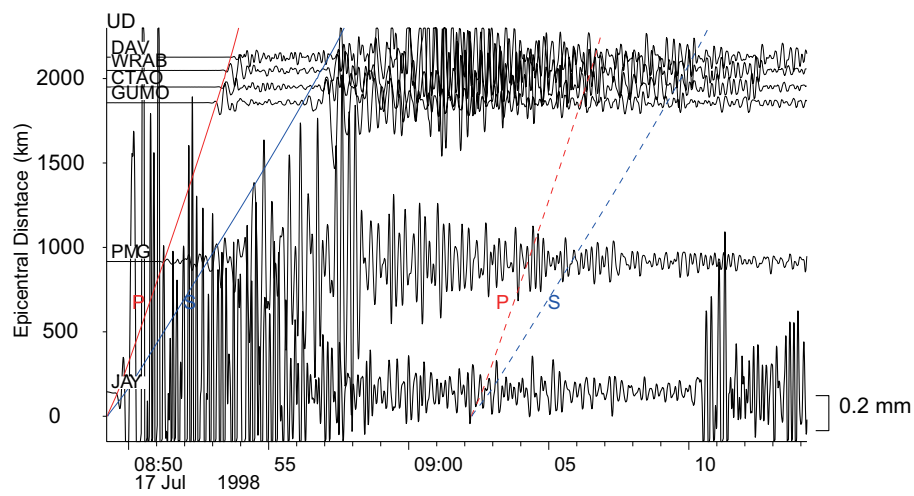

**Figure 7.** Seismic records of UD-component at six stations aligned according to the epicentral distance. A filter for amplitude measurement of surface wave magnitude is applied.

**Table 2.** Trigonometric source-time functions for each of the four intervals defined on Fig. 4.

|             |                                              |
|-------------|----------------------------------------------|
| $T_0 - T_1$ | $-A[\cos\{\pi(t - T_0)/(T_1 - T_0)\} - 1]/2$ |
| $T_1 - T_2$ | $A \cos\{\pi(t - T_1)/(T_2 - T_1)/2\}$       |
| $T_2 - T_3$ | $-A \sin\{\pi(t - T_2)/(T_3 - T_2)/2\}$      |
| $T_3 - T_4$ | $-A[\cos\{\pi(t - T_3)/(T_4 - T_3)\} + 1]/2$ |

$A$  denotes the peak of the force.



**Table 3.** Five sets of durations (s) used for the four intervals of the source-time function shown in Fig. 4.

|     | $T_1 - T_0$ | $T_2 - T_1$ | $T_3 - T_2$ | $T_4 - T_3$ |
|-----|-------------|-------------|-------------|-------------|
| (a) | 2           | 10          | 4           | 4           |
| (b) | 4           | 20          | 8           | 8           |
| (c) | 8           | 40          | 16          | 16          |
| (d) | 8           | 16          | 8           | 8           |
| (e) | 12          | 12          | 8           | 8           |

**Table 4.** Velocity structure model used to calculate synthetic records.  $Q_P$  and  $Q_S$  are P- and S-wave attenuation coefficients, respectively.

| Depth(Top) | Velocity (P)       | Velocity(S)        | Density            | $Q_P$ | $Q_S$ |
|------------|--------------------|--------------------|--------------------|-------|-------|
| km         | km s <sup>-1</sup> | km s <sup>-1</sup> | g cm <sup>-3</sup> |       |       |
| 0          | 5.3                | 3.06               | 2.6                | 300   | 150   |
| 4          | 6.1                | 3.52               | 2.7                | 300   | 150   |
| 14.6       | 6.7                | 3.87               | 3.0                | 500   | 250   |
| 31.5       | 8.0                | 4.62               | 3.2                | 600   | 300   |
